# Supplementary material
Source: HighWire-hosted journal article supplement (https://bjo.bmj.com/content/106/6/765)
Supplement: inline-supplementary-material-1 [file inline-supplementary-material-1.pdf]

Supplementary Materials

Search strategies

i. MedLine(OViD) and Embase

- 1exp cornea/
- 2cornea\*.tw.
- 31 or 2
- 4exp ophthalmic nerve/
- 5nerve\*.tw.
- 6subbasal.tw.
- 7sub-basal.tw.
- 8mm?mm.tw.
- 9neuropath\*.tw.
- 10plex\*.tw.
- 114 or 5 or 6 or 7 or 8 or 9 or 10
- 12confocal.tw.
- 13microscop\*.tw.
- 14"in?vivo".tw.
- 1512 or 13 or 14
- 163 and 11 and 15

ii. The Cochrane library

- 1cornea
- 2nerve\*
- 3innervat\*
- 4subbasal
- 5sub-basal
- 6mm?mm
- 7neuropath\*
- 8plex\*
- 9confocal
- 10microscop\*
- 11"in?vivo"

- 12 2 or 3 or 4 or 5 or 6 or 7 or 8
- 13 9 or 10 or 11
- 14 1 and 12 and 13

Figure S1. PRISMA study flow diagram

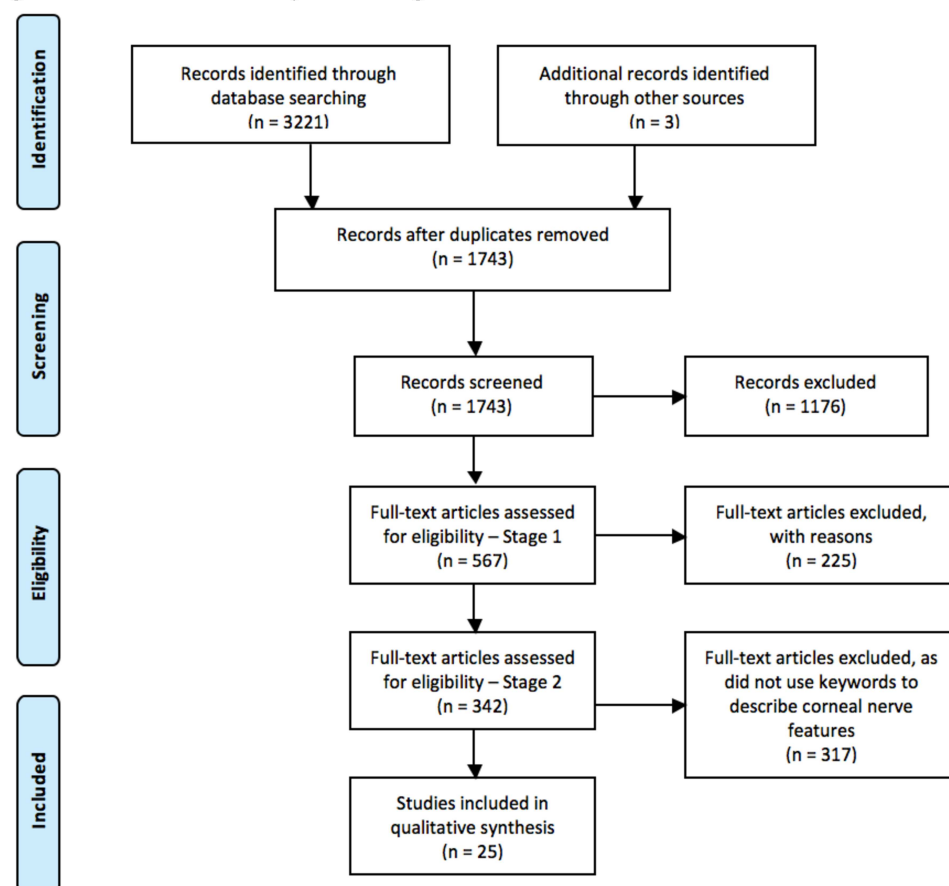

**Table S1 – Characteristics of Included Studies**

| First author (year) | Research question type and study design | Journal                   | Participants/ Population                                                             | Corneal nerve plexus evaluated | Representative corneal IVCN image provided in paper?                                                                                                                                            | Corneal region where nerve feature(s) noted | Number of corneal nerve IVCN images analyzed per participant; IVCN scan mode | Masking of IVCN method: image selection; image analysis | Keyword(s) present (Pathological or Physiological context)                                                                                      |
|---------------------|-----------------------------------------|---------------------------|--------------------------------------------------------------------------------------|--------------------------------|-------------------------------------------------------------------------------------------------------------------------------------------------------------------------------------------------|---------------------------------------------|------------------------------------------------------------------------------|---------------------------------------------------------|-------------------------------------------------------------------------------------------------------------------------------------------------|
| Patel (2005)[13]    | Methodological – retrospective cohort   | Invest Ophthalmol Vis Sci | Normal eyes (n=3)                                                                    | Sub-basal                      | Yes (Figure 5) of “probable sites of perforation of nerves through Bowman’s layer”                                                                                                              | Infero-temporal mid-periphery               | >373 for each participant; section scan mode                                 | NA                                                      | <ul style="list-style-type: none"> <li>• Perforation (Physiological)</li> </ul>                                                                 |
| Patel (2006)[22]    | Methodological – retrospective cohort   | Invest Ophthalmol Vis Sci | Eyes with keratoconus (n=4)                                                          | Sub-basal                      | Yes (Figure 4) of “apparent abrupt terminations of sub-basal nerve fiber bundles”                                                                                                               | “Region of the cone”                        | NR; section scan mode                                                        | NA                                                      | <ul style="list-style-type: none"> <li>• Abnormalities</li> <li>• Abrupt</li> <li>• Perforation (all Pathological)</li> </ul>                   |
| Hu (2008)[25]       | Etiology – case-control                 | Ophthalmol                | Patients with atopic keratoconjunctivitis (n=21) and healthy controls (n=19)         | Sub-basal and stromal          | Yes (Figure 6) of “abrupt terminations” in sub-basal plexus                                                                                                                                     | Central                                     | “3 clearest images”; sequence scan mode                                      | Selection – NR; Analysis - Yes                          | <ul style="list-style-type: none"> <li>• Abnormalities</li> <li>• Abrupt</li> <li>• Bifurcation</li> <li>• Sprout (all Pathological)</li> </ul> |
| Niederer (2008)[23] | Etiology – cross-sectional              | Invest Ophthalmol Vis Sci | Patients with keratoconus (n=52) and age-matched controls (n=52)                     | Sub-basal and stromal          | Yes (Figure 2), but not of nerve features of interest <i>per se</i>                                                                                                                             | Central                                     | 3 images; section scan mode                                                  | Selection – NR; Analysis - NR                           | <ul style="list-style-type: none"> <li>• Abruptly (Pathological)</li> </ul>                                                                     |
| Zhao (2008)[26]     | Etiology – cross-sectional              | Klin Monatsbl Augenheilkd | Patients with various types of polyneuropathy (n=18) and age-matched controls (n=15) | Sub-basal and stromal          | Yes (Figure 1) of “abundant sprouting of sub-basal nerve bundles”; (Figure 2B), large hyper-reflective, round features in the sub-basal nerve plexus are shown, but are referred to as "beads". | Central                                     | 3 to 5 images; “full layer corneal scans”                                    | Selection – Yes; Analysis - Yes                         | <ul style="list-style-type: none"> <li>• Sprouting (Pathological)</li> </ul>                                                                    |

| First author (year) | Research question type and study design | Journal                   | Participants/ Population                                                          | Corneal nerve plexus evaluated | Representative corneal IVCN image provided in paper?                                                                                                            | Corneal region where nerve feature(s) noted         | Number of corneal nerve IVCN images analyzed per participant; IVCN scan mode                                                  | Masking of IVCN method: image selection; image analysis | Keyword(s) present (Pathological or Physiological context)                                                                                                                                                                                       |
|---------------------|-----------------------------------------|---------------------------|-----------------------------------------------------------------------------------|--------------------------------|-----------------------------------------------------------------------------------------------------------------------------------------------------------------|-----------------------------------------------------|-------------------------------------------------------------------------------------------------------------------------------|---------------------------------------------------------|--------------------------------------------------------------------------------------------------------------------------------------------------------------------------------------------------------------------------------------------------|
| Lagali (2009)[27]   | Etiology – prospective cohort           | Invest Ophthalmol Vis Sci | Patients who underwent PTK (n=13)                                                 | Sub-basal and stromal          | Yes (Figure 3) of “presumed sprouting subbasal nerves” and “presumed sprouts... and mildly tortuous regenerated subbasal nerves”                                | Scanned “several millimeters of central cornea”     | 6 images; “cross-sectional images”; and additional confocal scans obtained across a 3- to 4-mm central region of each cornea” | NA                                                      | <ul style="list-style-type: none"> <li>• Presumed sprout/ing (Pathological)</li> </ul>                                                                                                                                                           |
| Vera (2009)[28]     | Etiology – cross-sectional              | Cornea                    | Patients with chronic symptoms of neuropathic corneal pain (n=25)                 | Sub-basal                      | Yes (Figure 2) of “nerve sprouting”                                                                                                                             | Central and peripheral                              | NR; NR                                                                                                                        | NA                                                      | <ul style="list-style-type: none"> <li>• Sprouting (Pathological)</li> </ul>                                                                                                                                                                     |
| Rao (2010)[29]      | Intervention – prospective cohort       | Br J Ophthalmol           | Eyes of patients with neurotrophic keratopathy (n=6)                              | Sub-basal                      | Yes (Figure 2) of “nerve stumps” and (Figure 4) of “nerve sprouts”                                                                                              | Central                                             | 4 randomly-selected images; “sequential” imaging                                                                              | Selection – NR; Analysis - NR                           | <ul style="list-style-type: none"> <li>• Sprout</li> <li>• Stump (all Pathological)</li> </ul>                                                                                                                                                   |
| Al-Aqaba (2011)[31] | Etiology – case series                  | Am J Ophthalmol           | Eyes (n=25) of bullous keratopathy (n=25) and eyes (n=6) of normal controls (n=6) | Sub-basal and stromal          | Yes (Figure 1) of “bulbous terminations of sub-basal nerves”; ”; and (Figure 2) “localized nerve excrescences or thickenings ...suggestive of early sprouting)” | “Central and paracentral (approximately 7mm x 7mm)” | NR, although states “approximately 7x7mm of cornea”; “scanned through all layers”                                             | Selection – NR; Analysis - NR                           | <ul style="list-style-type: none"> <li>• Bifurcations (Physiological)</li> <li>• Bulb-like (Physiological)</li> <li>• Bulbous termination (Physiological)</li> <li>• Perforation (Physiological)</li> <li>• Sprout/ing (Pathological)</li> </ul> |

| First author (year) | Research question type and study design | Journal                   | Participants/ Population                                       | Corneal nerve plexus evaluated | Representative corneal IVCN image provided in paper?                | Corneal region where nerve feature(s) noted                                                                            | Number of corneal nerve IVCN images analyzed per participant; IVCN scan mode | Masking of IVCN method: image selection; image analysis | Keyword(s) present (Pathological or Physiological context)                                                                                                                    |
|---------------------|-----------------------------------------|---------------------------|----------------------------------------------------------------|--------------------------------|---------------------------------------------------------------------|------------------------------------------------------------------------------------------------------------------------|------------------------------------------------------------------------------|---------------------------------------------------------|-------------------------------------------------------------------------------------------------------------------------------------------------------------------------------|
|                     |                                         |                           |                                                                |                                |                                                                     |                                                                                                                        |                                                                              |                                                         | <ul style="list-style-type: none"> <li>Thickening (Pathological)</li> </ul>                                                                                                   |
| Zheng (2011)[32]    | Etiology – cross-sectional              | Invest Ophthalmol Vis Sci | Patients with unilateral PXF (n=27) and normal controls (n=27) | Sub-basal                      | Yes (Figure 4) of “nerve sprouts”                                   | Central                                                                                                                | “3 best focussed images”; sequence scan mode                                 | Selection – NR; Analysis - Yes                          | <ul style="list-style-type: none"> <li>Sprout (Pathological)</li> </ul>                                                                                                       |
| Deng (2012)[33]     | Intervention – prospective cohort       | Neural Regen Res          | Myopic patients (n=26) who underwent LASIK                     | Sub-basal and stromal          | Yes (Figure 5) of “dilated head ends”                               | “From the margin of the ablation zone to the center at each four quadrants (superior, inferior, nasal and bitemporal)” | NR; section scan mode                                                        | Selection – NR; Analysis - NR                           | <ul style="list-style-type: none"> <li>Ends</li> <li>Stump (Pathological)</li> </ul>                                                                                          |
| Shaheen (2014)[3]   | Review                                  | Surv Ophthalmol           | NA                                                             | Sub-basal and stromal          | Yes (Figure 3), but not of nerve features of interest <i>per se</i> | NR                                                                                                                     | NA                                                                           | NA                                                      | <ul style="list-style-type: none"> <li>Abrupt (Pathological)</li> <li>Bifurcate/bifurcation (Physiological)</li> <li>Endings (Physiological)</li> <li>Microneuroma</li> </ul> |

| First author (year)  | Research question type and study design   | Journal         | Participants/ Population                                                                   | Corneal nerve plexus evaluated | Representative corneal IVCN image provided in paper?             | Corneal region where nerve feature(s) noted | Number of corneal nerve IVCN images analyzed per participant; IVCN scan mode | Masking of IVCN method: image selection; image analysis | Keyword(s) present (Pathological or Physiological context)                                           |
|----------------------|-------------------------------------------|-----------------|--------------------------------------------------------------------------------------------|--------------------------------|------------------------------------------------------------------|---------------------------------------------|------------------------------------------------------------------------------|---------------------------------------------------------|------------------------------------------------------------------------------------------------------|
|                      |                                           |                 |                                                                                            |                                |                                                                  |                                             |                                                                              |                                                         | (Pathological)<br>• Sprout (Pathological)                                                            |
| Aggarwal (2015)[11]  | Intervention – retrospective case-control | Ocular Surface  | Patients with neuropathy-induced severe photoallodynia (n=16) and normal controls (n=16)   | Sub-basal                      | Yes (Figures 1 and 3) of “neuromas”                              | Central                                     | “3 images most-representative of the sub-basal nerve plexus”; sequence mode  | Selection – Yes; Analysis - Yes                         | • Abrupt<br>• Endings<br>• Neuroma<br>• Sprouting<br>• Stump<br>• Swelling (all Pathological)        |
| Parissi (2016)[24]   | Etiology – prospective cohort             | JAMA Ophthalmol | Patients with keratoconus who underwent CXL (n=19) and age-matched healthy controls (n=19) | Sub-basal                      | Yes (Figure 5) of “abrupt orientation changes after penetration” | Central                                     | 3 images meeting quality criteria; sequence scan mode                        | Selection; NR; Analysis - Yes                           | • Abrupt<br>• Penetration point (Pathological)                                                       |
| Cruzat (2017)[2]     | Review                                    | Ocular Surface  | NA                                                                                         | Sub-basal and stromal          | Yes (Figure 10) of “neuromas”                                    | Central                                     | NA                                                                           | NA                                                      | • Abrupt<br>• Endings<br>• Microneuroma<br>• Neuroma<br>• Sprouting<br>• Swelling (all Pathological) |
| Dieckmann (2017)[34] | Review                                    | Ophthalmology   | NA                                                                                         | Sub-basal                      | Yes (Figure 4) of “micro-neuromas”                               | NR                                          | NA                                                                           | NA                                                      | • Endings<br>• Micro-neuromas<br>• Swelling (all Pathological)                                       |

| First author (year)    | Research question type and study design  | Journal          | Participants/ Population                                                                                          | Corneal nerve plexus evaluated | Representative corneal IVCN image provided in paper?                | Corneal region where nerve feature(s) noted | Number of corneal nerve IVCN images analyzed per participant; IVCN scan mode                    | Masking of IVCN method: image selection; image analysis | Keyword(s) present (Pathological or Physiological context)                                                                                                            |
|------------------------|------------------------------------------|------------------|-------------------------------------------------------------------------------------------------------------------|--------------------------------|---------------------------------------------------------------------|---------------------------------------------|-------------------------------------------------------------------------------------------------|---------------------------------------------------------|-----------------------------------------------------------------------------------------------------------------------------------------------------------------------|
| Giannacarre (2017)[12] | Intervention – single-arm open label     | Cornea           | Patients with ocular surface disease (n=20)                                                                       | Sub-basal                      | Yes (Figure 1) of “neuromas”                                        | NR                                          | “3 images most representative”; sequence scan mode                                              | Selection; Yes; Analysis - Yes                          | <ul style="list-style-type: none"> <li>• Abrupt</li> <li>• Endings</li> <li>• Neuroma</li> <li>• Stumps (all Pathological)</li> </ul>                                 |
| Goyal (2017)[5]        | Review                                   | Semin Ophthalmol | NA                                                                                                                | Sub-basal and stromal          | Yes (Figure 1), but not of nerve features of interest <i>per se</i> | NR                                          | NA                                                                                              | NA                                                      | <ul style="list-style-type: none"> <li>• Abnormalities</li> <li>• Bulbous</li> <li>• Neuroma</li> <li>• Sprouts/ing</li> <li>• Swelling (all Pathological)</li> </ul> |
| Cavalcanti (2018)[35]  | Etiology – case-control                  | Ocular Surface   | Patients with unilateral HZO (n=24) and the contralateral normal eyes, and 24 normal volunteers as controls       | Sub-basal                      | Yes (Figure 5) of “neuromas”                                        | Central                                     | “minimum of 3 representative images” from “at least 50 good quality images”; sequence scan mode | Selection; Yes; Analysis - Yes                          | <ul style="list-style-type: none"> <li>• Microneuroma</li> <li>• Neuroma (all Pathological)</li> </ul>                                                                |
| Fung (2018)[30]        | Intervention – case series               | Cornea           | Patients with unilateral advanced NK who underwent corneal neurotization (n=2)                                    | Sub-basal and stromal          | Yes (Figure 2) of “nerve sprouts”                                   | Central                                     | NR; volume scan mode                                                                            | Selection – NR; Analysis - NR                           | <ul style="list-style-type: none"> <li>• Sprout</li> <li>• Stumps (all Pathological)</li> </ul>                                                                       |
| Morkin (2018)[7]       | Intervention – retrospective case series | Ocular Surface   | Patients with neuropathic corneal pain who received self-retained cryopreserved amniotic membrane (PROKERA) (n=9) | Sub-basal                      | Yes (Figure 2), but not of nerve features of interest <i>per se</i> | Central                                     | “4 representative images”; “full-thickness coronal corneal scans”                               | Selection – Yes; Analysis - Yes                         | <ul style="list-style-type: none"> <li>• Abrupt endings</li> <li>• Microneuroma (all Pathological)</li> </ul>                                                         |



| First author (year) | Research question type and study design   | Journal          | Participants/ Population                                                               | Corneal nerve plexus evaluated | Representative corneal IVCN image provided in paper?                                                      | Corneal region where nerve feature(s) noted | Number of corneal nerve IVCN images analyzed per participant; IVCN scan mode                                | Masking of IVCN method: image selection; image analysis | Keyword(s) present (Pathological or Physiological context)                                                                                                                                                                                                                                                                                                     |
|---------------------|-------------------------------------------|------------------|----------------------------------------------------------------------------------------|--------------------------------|-----------------------------------------------------------------------------------------------------------|---------------------------------------------|-------------------------------------------------------------------------------------------------------------|---------------------------------------------------------|----------------------------------------------------------------------------------------------------------------------------------------------------------------------------------------------------------------------------------------------------------------------------------------------------------------------------------------------------------------|
| Aggarwal (2019)[4]  | Intervention – retrospective case-control | Ocular Surface   | Patients with severe neuropathic corneal pain (n=16) and controls (n=12)               | Sub-basal                      | Yes (Figures 1 and 3) of “micro-neuromas”                                                                 | Central                                     | “3 images most representative of the subbasal nerve plexus” from 50-100 acquired images; sequence scan mode | Selection – Yes; Analysis - Yes                         | <ul style="list-style-type: none"> <li>• Micro-neuroma</li> <li>• Stump (all Pathological)</li> </ul>                                                                                                                                                                                                                                                          |
| Al-Aqaba (2019)[21] | Review                                    | Prog Ret Eye Res | NA                                                                                     | Sub-basal and stromal          | Yes (Figures 12 and 24) of “bulb-like termination of sub-basal nerves”                                    | NR                                          | NA                                                                                                          | NA                                                      | <ul style="list-style-type: none"> <li>• Bifurcations (Physiological)</li> <li>• Bulb-like termination (Physiological)</li> <li>• Endings (Physiological)</li> <li>• Microneuroma (Pathological)</li> <li>• Perforation (Physiological)</li> <li>• Sprouting (Pathological)</li> <li>• Swelling (Physiological)</li> <li>• Thickened (Pathological)</li> </ul> |
| Ross (2019)[8]      | Etiology – cross-sectional                | Br J Ophthalmol  | Patients who had continuous severe ocular pain for at least 1 year, with minimal or no | Sub-basal and stromal          | Yes (Figure 4) of “microneuromas” and “nerve sprouts” in the stroma, and (Figure 5) of “fusiform neuroma” | Central and paracentral                     | NR; “scanned through all corneal layers”                                                                    | NA                                                      | <ul style="list-style-type: none"> <li>• Abnormalities</li> <li>• Hyper-reflective</li> <li>• Microneuromas</li> <li>• Neuromas</li> </ul>                                                                                                                                                                                                                     |

| First author (year) | Research question type and study design | Journal         | Participants/ Population                                                                                                     | Corneal nerve plexus evaluated | Representative corneal IVCN image provided in paper? | Corneal region where nerve feature(s) noted | Number of corneal nerve IVCN images analyzed per participant; IVCN scan mode | Masking of IVCN method: image selection; image analysis | Keyword(s) present (Pathological or Physiological context)                                       |
|---------------------|-----------------------------------------|-----------------|------------------------------------------------------------------------------------------------------------------------------|--------------------------------|------------------------------------------------------|---------------------------------------------|------------------------------------------------------------------------------|---------------------------------------------------------|--------------------------------------------------------------------------------------------------|
|                     |                                         |                 | ocular surface signs and non-response to traditional treatment (n=14 patients, 27 eyes), and 14 eyes from 7 healthy controls |                                |                                                      |                                             |                                                                              |                                                         | <ul style="list-style-type: none"> <li>• Stump</li> <li>• Swelling (all Pathological)</li> </ul> |
| Shen (2019)[36]     | Etiology – case-control                 | J Pain Research | Patients with episodic migraine (n=10) and age- and sex-matched controls (n=10)                                              | Sub-basal                      | Yes (Figure 1) of “nerve sprouts”                    | Central                                     | “3 high quality images”; “scanned through all the corneal layers”            | Selection - NR; Analysis - Yes                          | <ul style="list-style-type: none"> <li>• Injury</li> <li>• Sprouts (all Pathological)</li> </ul> |

**Abbreviations:** Am, American; Br, British; CXL, corneal collagen cross-linking; HZO, herpes zoster ophthalmicus; Invest Ophthalmol Vis Sci, Investigative Ophthalmology and Visual Science; IVCN, in vivo confocal microscopy; J, journal; JAMA, Journal of the American Medical Association; LASIK, laser in situ keratomileusis; MDF, map-dot fingerprint; NA, not applicable; NK, neurotrophic keratopathy; NR, not reported; Ophthalmol, ophthalmology; Prog Ret Eye Res, Progress in Retinal and Eye Research; PTK, phototherapeutic keratectomy; PXF, pseudoexfoliation syndrome; Regen, Regenerative; Res, Research; Semin, Seminar; Surv, Survey
